# Original Investigations

## JAMIA

### Research Methods ■

## Columbia University's Informatics for Diabetes Education and Telemedicine (IDEATel) Project:

### Rationale and Design

STEVEN SHEA, MD, JUSTIN STARREN, MD, PhD, RUTH S. WEINSTOCK, MD, PhD, PAUL E. KNUDSON, MD, JEANNE TERESI, EdD, PhD, DOUGLAS HOLMES, PhD, WALTER PALMAS, MD, LESLEY FIELD, RN, MSN, ROBIN GOLAND, MD, CATHERINE TUCK, MD,<sup>†</sup> GEORGE HRIPCSAK, MD, LINNEA CAPPS, MD, DAVID LISS

**Abstract** The Columbia University Informatics for Diabetes Education and Telemedicine (IDEATel) Project is a four-year demonstration project funded by the Centers for Medicare and Medicaid Services with the overall goals of evaluating the feasibility, acceptability, effectiveness, and cost-effectiveness of telemedicine in the management of older patients with diabetes. The study is designed as a randomized controlled trial and is being conducted by a state-wide consortium in New York. Eligibility requires that participants have diabetes, are Medicare beneficiaries, and reside in federally designated medically underserved areas. A total of 1,500 participants will be randomized, half in New York City and half in other areas of the state. Intervention participants receive a home telemedicine unit that provides synchronous videoconferencing with a project-based nurse, electronic transmission of home fingerstick glucose and blood pressure data, and Web access to a project Web site. End points include glycosylated hemoglobin, blood pressure, and lipid levels; patient satisfaction; health care service utilization; and costs. The project is intended to provide data to help inform regulatory and reimbursement policies for electronically delivered health care services.

■ J Am Med Inform Assoc. 2002;9:49–62.

Affiliations of the authors: Columbia University, New York, New York (SS, JS, JT, WP, LF, RG, CT, GH); State University of New York (SUNY) Upstate Medical University, Syracuse, New York (RSW); Department of Veterans Affairs Medical Center, Syracuse, New York (PEK); Hebrew Home for the Aged at Riverdale, Bronx, New York (JT, DH); Harlem Hospital Center, New York, New York (LC); New York Presbyterian Hospital, New York, New York (DL).

This project was supported by cooperative agreement 95-C-90998

from the Centers for Medicare and Medicaid Services (CMS; formerly Health Care Financing Administration).

Correspondence and reprints: Steven Shea, MD, Division of General Medicine, 622 W. 168th Street, New York, NY 10032; e-mail: <ss35@columbia.edu>.

Received for publication: 5/15/01; accepted for publication: 10/9/01.

<sup>†</sup> Deceased.

The Centers for Medicare and Medicaid Services (CMS; previously the Health Care Financing Administration), the federal agency responsible for administering the Medicare program, does not currently reimburse health care providers for health care services delivered electronically to patients, except under a small number of limited demonstration projects. Reimbursement requires face-to-face interaction between provider and patient. In rural areas, access to face-to-face care may be impeded by geographic distance, weather, and provider shortages. In urban inner cities, with predominantly minority populations, obstacles to access include language, culture, low educational attainment, disempowerment, lack of social support for health-related behaviors and activities, and provider shortages. Telemedicine supports interactions that are both distant and asynchronous. These capabilities have the potential to improve access and thereby contribute to reductions in disparities among sociodemographic groups in access to care, quality of care, health outcomes, and health status.<sup>1</sup>

The Balanced Budget Act of 1997 mandated that the Health Care Financing Administration conduct a demonstration project to evaluate the feasibility, acceptability, effectiveness, and cost-effectiveness of advanced computer and telecommunication technology ("telemedicine") to manage the care of people with diabetes. A consortium (Table 1) led by Columbia University was selected to conduct this project. An award was made effective Feb 28, 2000, for a four-year project. In this paper we describe the rationale, target populations, intervention strategy, study design, and evaluation plan for the Informatics for Diabetes Education and Telemedicine (IDEATel) project.

## Background and Rationale

Diabetes mellitus is costly and common in the Medicare-eligible population, and its high prevalence and complexity pose major clinical challenges to effective case management using telemedicine. An estimated 15.7 million people in the United States have diabetes,<sup>2</sup> and 18 to 20 percent of men and women 60 to 74 years of age are affected. As many as one third of those affected are undiagnosed.<sup>3</sup>

This already high prevalence continues to increase because of the aging of the population and the rising prevalence of obesity. The prevalence of type 2 diabetes, which accounts for 90 to 95 percent of all diagnosed cases in adults, increases markedly with age and obesity, and African-Americans and Hispanics are at almost twice the risk of non-Hispanic whites.

The American Diabetes Association (ADA) estimates that, in 1997, diabetes cost Americans \$98.2 billion, including \$44 billion in direct medical costs.<sup>4</sup> Those over 65 years of age account for two thirds of all costs.<sup>4</sup> The long-term chronic complications of diabetes are responsible for most of the morbidity, mortality, and cost. Diabetes mellitus is the leading cause of end-stage renal disease (ESRD) in the United States, accounting for approximately 40 percent of incident cases.<sup>5</sup> In 1995, the number of persons with diabetes who were on dialysis or had had a kidney transplant exceeded 98,000.<sup>6</sup> Because of the aging of the population and the increasing age-specific incidence of diabetes, the prevalence of ESRD is increasing. The adjusted costs per case are also rising. Average annual Medicare payments per case (in 1996 U.S. dollars) were \$53,659 for ESRD due to diabetes.<sup>7</sup>

Diabetes is the leading cause of blindness in adults 20 to 74 years of age.<sup>6</sup> Diabetes-related blindness increases with age, with higher rates among minorities,<sup>8</sup> and is almost invariably preceded by diabetic retinopathy.<sup>8,9</sup> Annual dilated eye examinations are an effective screening modality in both type 1 and type 2 diabetes, since early retinopathy can be effective-

Table 1 ■

### IDEATel Project Consortium

---

|                                                                                     |
|-------------------------------------------------------------------------------------|
| Columbia University, New York, New York:                                            |
| Department of Medicine/Division of General Medicine                                 |
| Department of Medical Informatics                                                   |
| Naomi Berrie Diabetes Center                                                        |
| New York Presbyterian Hospital, New York, New York:                                 |
| Harlem Hospital Center, New York, New York:                                         |
| Department of Medicine/Division of General Medicine                                 |
| Harlem Renaissance HealthCare Network, New York, New York                           |
| The Hebrew Home for the Aged at Riverdale, Bronx, New York                          |
| State University of New York (SUNY) Upstate Medical University, Syracuse, New York: |
| Department of Medicine, Division of Endocrinology, Diabetes and Metabolism          |
| Department of Family Medicine                                                       |
| Joslin Diabetes Center (Syracuse)                                                   |
| University Hospital, Syracuse, New York                                             |
| Arnot Ogden Medical Center, Elmira, New York                                        |
| Bassett Healthcare, Cooperstown, New York                                           |
| Samaritan Medical Center, Watertown, New York                                       |
| Olean General Hospital, Olean, New York                                             |
| American Diabetes Association, Alexandria, Virginia                                 |
| American TeleCare, Inc., Eden Prairie, Minnesota                                    |
| Gentiva Health Care, Inc., Melville, New York                                       |
| Verizon, Inc., Reston, Virginia                                                     |
| Crosshair Technologies, Inc., Scarsdale, New York                                   |

---

tively treated with laser photocoagulation,<sup>10</sup> but a recent national survey found that 28 to 29 percent of people with diabetes who are over 65 years of age reported that they had not had a dilated eye examination in the previous year.<sup>11</sup>

Diabetic neuropathy, a major risk factor for lower extremity amputation, occurs in 60 to 70 percent of people with diabetes.<sup>6</sup> Hypertension is also common and clinically important,<sup>12</sup> affecting 60 to 65 percent of people with diabetes.<sup>6</sup>

Data for both type 1 and type 2 diabetes show that improved glycemic and blood pressure control lessen the incidence and progression of the microvascular complications of diabetes, including neuropathy, nephropathy, retinopathy, and blindness.<sup>8,13-17</sup> Most diabetes-related mortality is due to macrovascular disease, specifically, coronary artery and cerebrovascular disease. Appropriate treatment of hypertension and dyslipidemia has been shown to decrease these serious complications and to be cost-effective.<sup>17-21</sup> Lowering LDL (low-density lipoprotein) cholesterol in patients with diabetes but without known cardiovascular disease is as effective as lowering lipids in patients with known heart disease but without diabetes.<sup>22</sup> Thus, extensive evidence from clinical trials and observational studies supports the benefit of improving management of type 2 diabetes to prevent morbidity and mortality from both micro- and macrovascular disease.<sup>13-40</sup>

Medical informatics involves the study of various types of information and knowledge and the methods by which needed knowledge can be delivered during the process of care.<sup>41</sup> Availability of the right knowledge at the right time has the potential to affect prevention, patients' day-to-day activities, diagnosis, and treatment decisions.<sup>42-46</sup> New reimbursement models and easy connectivity via the Internet have stimulated investment in information systems that directly influence patient behavior,<sup>47</sup> and investigators have shown the benefits of several approaches to acquiring and delivering clinical and educational material.<sup>48</sup>

Although telemedicine technologies hold promise in many specific areas<sup>49</sup> and efforts have been made to evaluate a variety of activities involving different applications of telemedicine, the gaps in this knowledge base are substantial, as documented by recent overviews.<sup>50-55</sup> One comprehensive review of published telemedicine experience identified 455 telemedicine projects, of which 362 were in the United States and 50 provided services in patients' homes.<sup>55</sup> As reviewed in these reports, the relative lack of substantive evaluation data is related to many issues,

including the underlying difficulty and cost of conducting robust evaluation, lack of studies using randomized designs with controls, small sample sizes, short-term follow-up, and lack of multidisciplinary evaluation teams with experience in the use of well-developed measures of clinical effectiveness, process of care, and cost. Thus, despite the obvious promise of this technology, the clinical effectiveness of telemedicine, both in general and in specific clinical contexts, its acceptability to providers and patients, its costs, and its relative cost-effectiveness all remain poorly documented.<sup>51,52,55</sup> The IDEATel project is intended to address these gaps.

## Target Populations

The populations targeted by the IDEATel project are those with the greatest need for intervention. Eligibility criteria require that participants have diabetes mellitus and live in a federally designated medically underserved area at time of enrollment, defined by either of the two federal methodologies used for this purpose—medically underserved areas (MUAs) or health professional shortage areas (HPSAs). The urban component enrolls patients living in Harlem, Washington Heights, and Inwood in northern Manhattan, each of which is either MUA, HPSA, or both. The population of these areas is predominantly African American or Hispanic, with the majority of the Hispanic population having come originally from the Dominican Republic. In contrast to those originating in Puerto Rico, people in this group speak relatively little English. The intervention is therefore conducted in both English and Spanish in the urban component.

The rural component enrolls participants across the entire geographic span of upstate New York, an area nearly 800 miles in breadth. The medically underserved census tracts are interspersed throughout this area. The hubs of recruitment are physician networks centered in Elmira, Watertown, Cooperstown, Olean, and Syracuse. The patients in these groups are predominantly non-Hispanic white.

## Intervention

Participants randomized to the intervention group receive a home telemedicine unit (HTU) (American Telecare Inc., Eden Prairie, Minnesota) with four main functions: synchronous videoconferencing, self-monitoring of fingerstick glucose and blood pressure, messaging, and Web access. The device is a Web-enabled computer with modem connection to an existing telephone line (Table 2).

Table 2 ■

### Telemedicine Intervention Capabilities for Patients, Primary Care Providers, and Nurse Case Managers

#### Patients:

- Videoteleconferencing
- Web-based educational materials
- Clinical data entry (glucose, blood pressure, diet, weight)
- Clinical data review
- Computer-generated alerts and reminders
- E-mail
- Monitored chat groups

#### Primary care providers:

- Electronic case management of diabetes patients
- Training and education
- E-mail

#### Nurse case managers:

- Videoteleconferencing
- Archive of stored images (e.g., foot ulcer monitoring)
- Web-based educational materials
- Clinical data review
- Computer-generated alerts and reminders
- Workflow management
- Automated QA feedback on patient panels
- E-mail
- Monitoring of patient chat groups

The HTU has several components: a video camera that provides 8 frames/sec video and a microphone for voice conferencing with nurse case managers at the Berrie Diabetes Center at Columbia University (urban component) or the Joslin Diabetes Center at SUNY Upstate Medical University (rural component); an FDA-approved home glucose meter and blood pressure cuff connected to a generic medical device data port, so that home readings can be uploaded into a high-performance computer database (the New York Presbyterian Hospital clinical information system repository<sup>56-59</sup>) that supports patients' access to their own clinical data through graphical and other data displays; secure messaging, including e-mail; and access to a special educational Web page in English and Spanish, created for the project by the American Diabetes Association.

The nurse case managers are trained in diabetes management and in the use of computer-based case management tools that facilitate interactions through videoconferencing with patients.

Medicare beneficiaries with diabetes make an average of 6.8 provider visits per year.<sup>60</sup> The intervention seeks to extend these interactions by incorporating telemedicine technology into clinical care using approaches justified by behavioral theory<sup>61-63</sup> and prior intervention research. The approach is patient-targeted and aims to build self-reliance, elicit well-

defined behaviors, and reduce provider burden by empowering patients. The intervention strategy also draws on a growing body of research suggesting that telephone outreach is an efficacious strategy for influencing health-related behaviors,<sup>64</sup> that tailored messages are an important strategy for influencing behavioral change,<sup>65,66</sup> and that videotelephone contact may be more effective than voice-only contact.<sup>67</sup>

We hypothesized that the intervention will improve patient outcomes by several mechanisms. More frequent interactions between patients and providers will enable patients to initiate more rapid behavior changes (e.g., self-monitoring, compliance) as well as changes in their treatment regimens, without an office visit. Closer monitoring (e.g., glucose, blood pressure, diet) will be coupled with quicker feedback from the provider. In this way, better and more rapid glucose and blood pressure control may be achieved and maintained.

Face-to-face interaction by videoteleconferencing with a case manager will enhance compliance and promote maintenance as well as initiation of positive behavior changes. Having visible contact with a health care provider is important to most patients, especially when the provider is knowledgeable, empathic, and interested in the patient's diabetes as well as in the patient as a person. In allocating telemedicine case manager time, we projected one full-time equivalent for each 200 diabetic patients, allowing ample time for one contact every two weeks, but with higher intensity during periods when needed.

Finally, patients' diabetes educational needs are now usually addressed through on-site classes and print materials, but the all-at-once approach may produce information overload rather than useful learning and enhanced self-efficacy for participation in care. Education and information in small pieces, related in time to patient-specific information needs, may be a more effective way to provide self-management education for diabetes. Education and information are available in this way from the case managers and from the project Web site.

The case managers actively invite and coach patients to use these information resources. For example, to a patient who is having difficulty controlling diet, the case manager might suggest a chat group and point to specific educational and motivational resources. Access to monitored chat groups, where patients can learn from each other, share problems and solutions, and gain and give psychological support, may also enhance effective learning for sustained behavior change.

We use version 2.2b (updated May 2000) of the Veterans Health Administration (VHA) *Clinical Practice Guidelines for the Management of Diabetes Mellitus in the Primary Care Setting*.<sup>68</sup> These guidelines are flexible, annotated, evidence based, and algorithmic in format. They were designed with input from a number of federal health-related agencies, including the VHA; the Diabetes Division of the National Institute for Diabetes, Digestive and Kidney Diseases; the Division of Diabetes Translation, Centers for Disease Control and Prevention; the Office of Managed Care, CMS; and the Pharmacoeconomic Center of the Department of Defense, United States Air Force. The content of other guidelines, especially those of the American Diabetes Association, have been largely incorporated in the VHA guidelines. The majority of these algorithms are suitable for automation and incorporation into triggers in the case management software. Case managers are trained to follow these algorithms.

Intervention subjects are assigned to a project case manager under supervision of diabetologists at the Joslin Diabetes Center in Syracuse and the Naomi Berrie Diabetes Center in New York City. Case managers interact with patients using the HTU and case management software. The primary care physicians of intervention patients retain full responsibility and control over their patients' care. When a case manager believes that a change in management is indicated, he or she contacts the primary care physician (by e-mail, fax, or phone) just as a visiting nurse going physically to the home would do. This avoids disruption of established relationships and patterns of care and ensures continuity of care for intervention patients after the project ends.

## Evaluation Plan

The CMS is conducting its own evaluation of the IDEATel project through an independent contractor. This approach will enhance the objectivity of the findings and give credence to policy recommendations that derive from them. In addition, we are conducting a project evaluation that addresses selected dimensions of the comprehensive evaluation framework for telemedicine published by the Institute of Medicine.<sup>51</sup>

## Study Design

Participants are randomized to a telemedicine intervention group ( $N=750$ ) or a control group ( $N=750$ ) receiving usual care. The technical component of the intervention was frozen at the start of the trial. It

would not be ethical or practical to freeze the medical content of the intervention, and we therefore allow the standards of medical care for diabetes in both intervention and control groups to reflect new knowledge over the course of the project. Each subject is enrolled in the project for two years, receiving either telemedicine or usual care for this period of time.

Half of the participants come from the urban component and half from the rural component. As described earlier, eligibility for participation requires that subjects be Medicare recipients, have diabetes mellitus, and live in a federally designated medically underserved area at time of enrollment. Exclusion criteria include cognitive, visual, or medical impairment to a degree that would preclude meaningful participation (Table 3). A telephone eligibility assessment is done prior to enrollment. Each subject enrolled in the study has a primary care physician, and randomization is within blocks defined by primary care physician patient panels.

## Study Outcomes

Feasibility is assessed by whether the implementation is successful. Acceptability is assessed by whether participants can use the devices effectively, like the devices and the electronic service delivery model of care, and are satisfied with their care. We are sensitive to the potential concern that telemedicine may be perceived as a less expensive substitute for face-to-face care for the poor. Effectiveness is evaluated by comparing mean and adjusted mean levels of outcomes in the intervention vs. control groups. The main study outcomes are glycosylated hemoglobin level, blood pressure level, and cost of care. Cost-effectiveness is assessed on the basis of effectiveness, measures of health care service utilization, and technology and service costs of the intervention.

Important secondary outcomes include lipid levels, smoking, quality of life, and patient satisfaction. Secondary process-of-care outcomes include receipt of recommended diabetes-specific health care services (e.g., dilated eye examination, foot examination), compliance, education and knowledge, and health beliefs. Evaluation data (Table 4 and Appendix) are collected from all participants at three visits: baseline (visit 1), one-year follow-up (visit 2), and two-year follow-up (visit 3). Additional evaluation data are collected from all participants by telephone at baseline and at three-month intervals between the in-person visits. These data focus on health care utilization but also include assessment of family support, smoking status, and quality of life.

Table 3 ■

## Exclusion Criteria

| Variable                                                       | Measure                                                                                                                                                        | Source of Measure                                                                                                                                                                                                   |
|----------------------------------------------------------------|----------------------------------------------------------------------------------------------------------------------------------------------------------------|---------------------------------------------------------------------------------------------------------------------------------------------------------------------------------------------------------------------|
| No diabetes                                                    | Does not meet clinical criteria of fasting blood sugar levels 126 mg/d or non-fasting 200 mg/dl when not taking glycemic control medication for diabetes       | American Diabetes Association <sup>71</sup>                                                                                                                                                                         |
| Moderate or severe cognitive impairment                        | The Comprehensive Assessment and Referral Evaluation (CARE) Diagnostic Scale (Cognitive Screen)                                                                | CARE <sup>72–75</sup>                                                                                                                                                                                               |
| Severe vision impairment                                       | Three severe items from the Vision Scale are used to exclude persons with severe vision impairment                                                             | Functional Vision Screening Questionnaire, <sup>76</sup> modified by the Lighthouse for the Blind from the Vision Disorder subscale of the Comprehensive Assessment and Referral Evaluation (CARE) <sup>73,77</sup> |
| Severe impairment of mobility                                  | Ten items (4 exclusionary) measuring ability to walk, use a wheelchair, and transfer to and from bed                                                           | Institutional Comprehensive Assessment and Referral Evaluation (INCARE) <sup>78–80</sup>                                                                                                                            |
| Severe impairment of fine motor coordination                   | Two items used to exclude those unable to hold and move objects; push-buttons and use telephone or home telemedicine unit                                      | IDEATel staff in collaboration with telemedicine technical and clinical staff                                                                                                                                       |
| Severe comorbid conditions                                     | Comorbid conditions likely to result in death or severe disability prior to completion of the study                                                            | IDEATel staff in collaboration with a diabetologist and clinical staff                                                                                                                                              |
| Severe expressive or receptive communication impairment        | Inability to communicate will interfere with the administration of the intervention by nurse case managers                                                     | INCARE <sup>78–80</sup>                                                                                                                                                                                             |
| Severe hearing disorder                                        | These items are helpful in determining either exclusion or need for implementation of aids (e.g., a voice amplifier for the phone) to facilitate communication | INCARE <sup>78–80</sup>                                                                                                                                                                                             |
| No available free electrical outlet for Home Telemedicine Unit |                                                                                                                                                                |                                                                                                                                                                                                                     |
| Spends more than 3 months at another location                  | Would dilute exposure to intervention                                                                                                                          |                                                                                                                                                                                                                     |

Table 4 ■

## IDEATel Study Outcomes

| Clinical Outcomes       | Services Utilization, Quality of Life and Satisfaction | Process of Care  | Case Mix or Control Variables |
|-------------------------|--------------------------------------------------------|------------------|-------------------------------|
| Glycosylated hemoglobin | Health care service utilization:                       | Patients:        | Demographic variables         |
| Blood pressure          | Medications and supplies                               | Compliance       | Functional status             |
| Lipid level             | Hospitalization and emergency room                     | Health habits    | Vision impairment             |
| Smoking                 | Physician services                                     | Self-monitoring  | Health status/comorbidity     |
| Urine microalbumin      | Homecare                                               |                  | Severity of disease           |
|                         | Family care                                            | Providers:       | Social support                |
|                         |                                                        | Dilated eye exam |                               |
|                         | Quality of life (QOL):                                 | Lipid profile    |                               |
|                         | Diabetes-related QOL                                   | Foot care        |                               |
|                         | General QOL                                            |                  |                               |
|                         | Depression                                             |                  |                               |
|                         | Satisfaction                                           |                  |                               |

## Intervention Implementation Tracking

All interactions of intervention group participants with the HTU are logged. These include contacts with the nurse case manager, the project Web page, the project monitored chat room, and the clinical database in which participants view their own clinical data. These log data are used to track the volume and content of electronic services delivered to intervention group participants (implementation tracking). Statistical modeling will be used to identify intervention components and process-of-care elements associated with improvement in outcomes in the intervention group.

## Sample Size and Least Detectable Differences

We projected that attrition rates at two years will be 15 percent in the intervention group and 20 percent in the control group, or that approximately 1,240 of the original 1,500 people randomized will complete the study. Alpha was set at 0.05 (two-sided) and beta at 0.80. Statistical analysis is based in intention to treat. For an intervention effect on systolic blood pressure of 5 mm Hg reduction, unadjusted for clustering, with 600 completers in each group, power is 0.97; for an effect of 3 mm Hg, power is approximately 0.68. For glycosylated hemoglobin, a difference in mean glycosylated hemoglobin level of 0.6 percent (7.9 vs. 8.5 percent in the two groups) can be detected with a sample size on 138 per group; adjustment for the cluster effect (patients clustered by physician panel) increases this number to 207 per group. Power calculations were also made for longitudinal random effects models under different scenarios for cluster effects for participants within physician panels and for repeat measures. These calculations showed that the study is powered to detect differences of these magnitudes overall and also, possibly, in subgroups defined by race/ethnicity or by urban/rural source.

## Policy Implications

The IDEATel project is designed to provide data that will inform policy formation in several areas. The first, alluded to earlier, is to demonstrate the feasibility of a large-scale, Web-based system for electronic delivery of health care services that complies with the data security requirements of the Health Insurance Portability and Accountability Act (HIPAA).<sup>69</sup> Second, if the intervention improves process and outcomes of care for persons with diabetes, and the cost-effectiveness of electronic health care service delivery is supported by project findings, policies regarding reimbursement are likely to evolve.

Questions that will need to be addressed depend in part on the payment mechanisms used to reimburse care. For example, the question of what constitutes a reimbursable service unit is central in a fee-for-service payment environment, whereas in a capitated environment the preferences of patients for electronic rather than face-to-face services may be more important in deciding whether to permit substitution of electronic services. Reimbursement policies will also require standards of documentation, for purposes of audit and quality review, and separation of technology costs (e.g., networks, databases, servers, and personnel to maintain them) from services costs (e.g., physician and nurse care manager time). Third, the legal environment in which the medical and nursing professions are credentialed, licensed, held accountable, disciplined, and insured for malpractice are largely based on individual state laws in the 50 states. There are differences among states in almost all these areas, and a variety of limitations resulting from state-based licensure impede the electronic delivery of health care services across state boundaries.<sup>70</sup>

In summary, the IDEATel project is a large, complex project designed to provide data relevant to policy formation for deployment of telemedicine. No single study can provide definitive answers to all or even most key questions. The complex, multifactorial, and behavioral nature of the intervention makes the study vulnerable to secular trends in diabetes care and technology development that may lead to convergence between the intervention and control groups. Nonetheless, the overall scope, design, and evaluation plan are intended to focus on realistic and informative endpoints, and the project provides an opportunity to address important questions about the use of telemedicine in everyday clinical practice.

The authors gratefully acknowledge the contributions of Dr. Paul D. Clayton to the conceptualization of this project and to the creation of the medical informatics infrastructure at Columbia-Presbyterian Medical Center.

## References ■

1. U.S. Department of Health and Human Services. Healthy People 2010. Washington, DC: U.S. Government Printing Office, Jan 2000.
2. National Diabetes Awareness Month—November 2000. MMWR Morb Mortal Wkly Rep. 2000;49:953.
3. Harris MI, Flegal KM, Cowie CC, et al. Prevalence of diabetes, impaired fasting glucose, and impaired glucose tolerance in U.S. adults: the third National Health and Nutrition Examination Survey, 1988–1994. Diabetes Care. 1998;21:518–24.
4. American Diabetes Association. Economic consequences of diabetes mellitus in the U.S. in 1997. Diabetes Care. 1998;21:296–309.
5. U.S. Renal Data System. USRDS 1995 Annual Data Report.

- Bethesda, Md.: National Institutes of Health, National Institute of Diabetes and Digestive and Kidney Diseases, Apr 1995:25–38.
6. National Institute of Diabetes and Digestive and Kidney Diseases. Diabetes Statistics. Bethesda, Md.: NIDDKD, March 1999. NIH publication 99-3892. Available at: <http://www.niddk.nih.gov/health/diabetes/pubs/dmstats/dmstats.htm>. Accessed Nov 16, 2001.
  7. O'Brien JA, Shomphe LA, Kavanagh PL, Raggio G, Caro JJ. Direct medical costs of complications resulting from type 2 diabetes in the U.S. *Diabetes Care*. 1998;21:1122–8.
  8. Klein R, Klein BE. Diabetic eye disease. *Lancet*. 1997;350:197–204.
  9. Cohen O, Norymberg K, Neumann E, Dekel H. Complication-free duration and the risk of development of retinopathy in elderly diabetic patients. *Arch Intern Med*. 1998;158:641–4.
  10. Ferris FL, Dosis MD, Aiello LM. Treatment of diabetic retinopathy. *N Engl J Med*. 1999;341:667–8.
  11. Levels of diabetes-related preventive care practices—United States, 1997–1999. *MMWR Morbid Mortal Wkly Rep*. 2000;49:954–8.
  12. Ravid M, Brosh D, Ravid-Safron D, Levy Z, Rachmani R. Main risk factors for nephropathy in type 2 diabetes mellitus are plasma cholesterol levels, mean blood pressure, and hyperglycemia. *Arch Intern Med*. 1998;158:998–1004.
  13. Cohen RA, Hennekens CH, Christen WG, et al. Determinants of retinopathy progression in type 1 diabetes mellitus. *Am J Med*. 1999;107:45–51.
  14. Barr CC. Retinopathy and nephropathy in patients with type 1 diabetes four years after a trial of intensive insulin therapy, by The Diabetes Control and Complications Trial/Epidemiology of Diabetes Interventions and Complications Research Group. *N Engl J Med*. 2000;342:381–9.
  15. U.K. Prospective Diabetes Study (UKPDS) Group. Intensive blood-glucose control with sulfonylureas or insulin compared with conventional treatment and risk of complications in patients with type 2 diabetes (UKPDS 33). *Lancet*. 1998;352:837–53.
  16. UK Prospective Diabetes Study (UKPDS) Group. Effect of intensive blood-glucose control with metformin on complications in overweight patients with type 2 diabetes (UKPDS 34). *Lancet*. 1998;352:854–65.
  17. UK Prospective Diabetes Study (UKPDS) Group. Tight blood pressure control and risk of macrovascular and microvascular complications in type 2 diabetes (UKPDS 38). *BMJ*. 1998;317:703–13.
  18. Pyorala K, Pedersen TR, Kjekshus J, Faergeman O, Olsson AG, Thorgeirsson G. Cholesterol lowering with simvastatin improves prognosis of diabetic patients with coronary heart disease: a subgroup analysis of the Scandinavian Simvastatin Survival Study (4S). *Diabetes Care*. 1997;20:614–20.
  19. Brown JB, Pedula KL, Bakst AW. The progressive cost of complications in type 2 diabetes mellitus. *Arch Intern Med*. 1999;159:1873–80.
  20. Hansson L, Zanchetti A, Carruthers SG, et al. Effects of intensive blood pressure lowering and low-dose aspirin in patients with hypertension: principal results of the Hypertension Optimal Treatment (HOT) randomized trial. *Lancet*. 1998;351:1755–62.
  21. UK Prospective Diabetes Study (UKPDS) Group. Cost effectiveness analysis of improved blood pressure control in hypertensive patients with type 2 diabetes (UKPDS 40). *BMJ*. 1998;317:720–6.
  22. Grover SA, Coupal L, Zowall H, Alexander CM, Weiss TW, Gomes DRJ. How cost-effective is the treatment of dyslipidemia in patients with diabetes but without cardiovascular disease? *Diabetes Care*. 2001;24:45–50.
  23. Dawber TR. The Framingham Study: The Epidemiology of Atherosclerotic Disease. Cambridge, Mass.: Harvard University Press, 1980.
  24. McKeigue PM, Kee H. Diabetes, insulin, ethnicity, and coronary heart disease. In: Marmot M, Elliott P (eds). *Coronary Heart Disease Epidemiology*. New York: Oxford University Press, 1992:217–32.
  25. National Diabetes Data Group. Diabetes in America. 2nd ed. Bethesda, Md.: National Institutes of Health, National Institute of Diabetes and Digestive and Kidney Diseases, 1995. NIH publication 95-1468.
  26. Collins R, Peto R, MacMahon S, et al. Blood pressure, stroke, and coronary heart disease, part 2: short-term reductions in blood pressure: overview of randomized drug trials in their epidemiological context. *Lancet*. 1990;335:827–38.
  27. American Heart Association. *Coronary Risk Handbook*. Dallas, Tex.: AHA, 1973.
  28. Barry J, Mead K, Nabel EG, et al. Effect of smoking on the activity of ischemic heart disease. *JAMA*. 1989;261:398–402.
  29. Rosenberg L, Palmer JR, Shapiro S. Decline in the risk of myocardial infarction among women who stop smoking. *N Engl J Med*. 1990;322:213–7.
  30. Ockene JK, Kuller LH, Svendsen KH, Meilahn E. The relationship of smoking cessation to coronary heart disease and lung cancer in the Multiple Risk Factor Intervention trial (MRFIT). *Am J Pub Health*. 1990;80:954–8.
  31. Kosmiski LA, Eckel RH. Dyslipidemia in noninsulin-dependent diabetes mellitus. In: Drazin B, Rizza R (eds). *Clinical Research in Diabetes and Obesity*. Vol. II: Diabetes and Obesity. Totowa, NJ: Humana, 1997:159–64.
  32. Sacks FM, Pfeffer MA, Moye LA, et al. The effect of pravastatin on coronary events after myocardial infarction in patients with average cholesterol levels. *N Engl J Med*. 1996;335:1001–9.
  33. Scandinavian Simvastatin Study Group. Randomized trial of cholesterol lowering in 4,444 patients with coronary heart disease: the Scandinavian Simvastatin Survival Study (4S). *Lancet*. 1994;344:1383–9.
  34. Shepherd J, Cobbe SM, Ford I, et al. Prevention of coronary heart disease with pravastatin in men with hypercholesterolemia. *N Engl J Med*. 1995;333:1301–7.
  35. National Cholesterol Education Program. Second Report of the Expert Panel on Detection, Evaluation, and Treatment of High Blood Cholesterol in Adults. Bethesda, Md.: National Institutes of Health, National Heart, Lung, and Blood Institute, 1993. NIH publication 93-3095.
  36. Kuusisto J, Mykkanen L, Pyorala K, Laakso M. NIDDM and its metabolic control predict coronary heart disease in elderly subjects. *Diabetes*. 1994;43:960–7.
  37. Kuusisto J, Mykkanen L, Pyorala K, Laakso M. Non-insulin-dependent diabetes and its metabolic control are important predictors of stroke in elderly subjects. *Stroke*. 1994;25:1157–64.
  38. Moss SE, Klein R, Klein BE, Meuer SM. The association of glycemia and cause-specific mortality in a diabetic population. *Arch Intern Med*. 1994;154:2473–9.
  39. The Diabetes Control and Complications Trial Research Group. The effect of intensive treatment of diabetes on the development and progression of long-term complications in insulin-dependent diabetes mellitus. *N Engl J Med*. 1993;329:977–86.
  40. Elliott WJ, Weir DR, Black HR. Cost-effectiveness of the lower treatment goal (of JNC VI) for diabetic hypertensive patients. *Arch Intern Med*. 2000;160:1277–83.



41. Greenes RA, Shortliffe EH. Medical informatics: an emerging academic discipline and institutional priority. *JAMA*. 1990;263:1114-20.
42. Collen MF. A History of Medical Informatics in the United States: 1950 to 1990. Bethesda, Md.: American Medical Informatics Association, 1995.
43. Dick RS, Steen EB (eds). *The Computer-based Patient Record: An Essential Technology for Health Care*. Washington DC: National Academy Press, 1991.
44. Sittig DF, Stead WW. Computer-based physician order entry: the state of the art. *J Am Med Inform Assoc*. 1994;1:108-23.
45. McDonald CJ, Overhage JM, Tierney WM, et al. The Regenstrief Medical Record System: a quarter century experience. *Int J Med Inform*. 1999;54:225-53.
46. Barry MJ, Fowler FJ Jr, Mulley AG Jr, Henderson JV Jr, Wennberg JE. Patient reactions to a program designed to facilitate patient participation in treatment decisions for benign prostatic hyperplasia. *Med Care*. 1995;33:771-82.
47. Tate DF, Wing RR, Winett RA. Using internet technology to deliver a behavioral weight loss program. *JAMA*. 2001;285:1172-7.
48. Tang PC, Hammond WE. A progress report on computer-based patient records in the United States. In: Dick RS, Steen EB, Detmer DE (eds). *The Computer-based Patient Record* (rev ed). Washington DC: National Academy Press, 1997:1-20.
49. Bashshur RL, Sanders JH, Shannon GW (eds). *Telemedicine: Theory and Practice*. Springfield, Ill.: Charles C. Thomas, 1997.
50. Agency for Health Care Policy and Research. *Consumer Health Informatics and Patient Decision-making*. Rockville, Md.: AHCPR, Sep 1997. AHCPR publication 98-N001.
51. Field MF (ed). *Telemedicine*. Institute of Medicine Committee on Evaluating Clinical Applications in Telemedicine. Committee on Evaluating Clinical Applications of Telemedicine, Institute of Medicine. Washington, DC: National Academy Press, 1996.
52. *Telemedicine Report to Congress*. Health Care Financing Agency Web site. 1997. Available at: <http://www.hcfa.gov/pubforms/telemed.htm>. Accessed Nov 16, 2001.
53. Grigsby J. Study of medical consultation using interactive video. Revised design, summary as of Dec 1997. Personal communication, 1997.
54. Mair F, Whitten P. Systematic reviews of studies of patient satisfaction with telemedicine. *BMJ*. 2000;320:1517-20.
55. Hersh WR, Wallace JA, Patterson PK, et al. *Telemedicine for the Medicare Population*. Rockville, Md.: Agency for Healthcare Research and Quality, July 2001. Evidence Report/Technology Assessment 24. AHRQ publication 01-E011. Available at: <http://www.ahrq.gov/clinic/telemedsum.htm>.
56. Clayton PD, Sideli RV, Sengupta S. Open architecture and integrated information at Columbia-Presbyterian Medical Center. *MD Comput*. 1992;9:297-303.
57. Cimino JJ. From data to knowledge through concept-oriented terminologies: experience with the Medical Entities Dictionary. *J Am Med Inform Assoc*. 2000;7:288-97.
58. Johnson S, Friedman C, Cimino JJ, Clark T, Hripcsak G, Clayton PD. Conceptual model for a central patient database. *Proc Annu Symp Comput Appl Med Care*. 1991:381-5.
59. Hripcsak G, Cimino JJ, Sengupta S. Web CIS: large scale deployment of a web-based clinical information system. *Proc AMIA Annu Symp*. 1999:804-8.
60. Kahn R. Personal communication with S. Shea, May 4, 2000.
61. Green LW, Kreuter MW. *Health Promotion Planning: An Educational and Environmental Approach* (2nd ed). Mountain View, Calif.: Mayfield, 1991.
62. Prochaska JO, Velicer WF, Rossi JS, et al. Standardized, individualized, interactive and personalized self-help programs for smoking cessation. *Health Psychol*. 1993;12:399-405.
63. Bandura A. *Self-efficacy: The Exercise of Control*. New York: W.H. Freeman, 1997.
64. Soet JE, Basch CE. The telephone as a communication medium. *Health Educ Behav*. 1997;24:759-72.
65. Rimer BK, Glassman B. Tailoring communications for primary care settings. *Methods Inf Med*. 1998;37:1610-11.
66. Campbell MK, DeVellis BM, Strecher VJ, et al. The impact of message tailoring on dietary behavior change for disease prevention in primary care settings. *Am J Public Health*. 1994;84:43-9.
67. Fulmer TT, Feldman, PH, Kim TS, et al. Medication compliance in the elderly. *J Gerontol Nurs*. 1999;28:6-14.
68. Department of Veterans Affairs. Veterans Health Administration Diabetes Program. VHA Clinical Practice Guidelines for the Management of Diabetes Mellitus in the Primary Care Setting. May 2000. Available at: <http://www.humanitas.com/vha/dm/index.htm>. Accessed Nov 16, 2001.
69. The Health Insurance Portability and Accountability Act of 1996. HIPAA Web page. Available at: <http://www.hcfa.gov/hipaa/hipaahm.htm>. Accessed Apr 24, 2001.
70. Grigsby J, Sanders JH. Telemedicine: where it is and where it's going. *Ann Intern Med*. 1998;129:123-7.
71. The Expert Committee on the Diagnosis and Classification of Diabetes Mellitus. Report of the Expert Committee on the Diagnosis and Classification of Diabetes Mellitus. *Diabetes Care*. 2001;24 (suppl 1):S5-20.
72. Gurland BJ, Kuriansky JB, Sharpe L, Simon R, Stiller P, Birkett P. The Comprehensive Assessment and Referral Evaluation (CARE): rationale, development and reliability. *Int J Aging Human Dev*. 1977;8:9-42.
73. Golden RR, Teresi JA, Gurland BJ. Development of indicator scales for the Comprehensive Assessment and Referral Evaluation (CARE) interview schedule. *J Gerontol*. 1984;39:138-96.
74. Gurland BJ, Wilder DE, Cross PE, Teresi JA, Barrett VW. Screening scales for dementia: toward reconciliation of conflicting cross-cultural findings. *Int J Geriatr Psychiatry*. 1992;7:105-13.
75. Gurland BJ, Wilder D, Lantigua R, et al. Differences in rates of dementia between ethno-racial groups. In: Martin LG, Soldo BJ (eds). *Racial and ethnic differences in health of older Americans*. Washington, DC: National Academy Press, 1997: 233-69.
76. Horowitz A, Teresi JA, Cassels LA. Development of a vision screening questionnaire for older people. *J Gerontol Soc Work*. 1991;17:37-56.
77. Gurland B, Wilder D. The CARE interview revisited: development of an efficient, systematic, clinical assessment. *J Gerontol*. 1984;39:129-37.
78. Gurland B, Cross P, Defiguerido J, Shannon M, Mann A, Jenkins R. A cross-national comparison of the institutionalized elderly in the cities of New York and London. *Psychol Med*. 1979;9:781-8.
79. Holmes D, Teresi J, Weiner A, Monaco C, Ronch J, Vickers R. Characteristics of patients in special care units. *Gerontologist*. 1990;30:178-83.
80. Teresi J, Holmes D, Benenson E, et al. A primary care model in long-term care facilities: evaluation of impact on affect, behavior and socialization. *Gerontologist*. 1993;33:667-74.

*Appendix begins on following page.*

## Appendix

Summary of Variable Category, Constructs, Measures, Sources, and Psychometric Properties of Outcome Measures in IDEATel

| Variable Category/Construct                                                                                              | Measure                                                                                                                                                                                                                                                                                   | Source of Measure                                                                                                                                                                                                                             | Populations for Normative Data                     | Reliability Estimate                                |
|--------------------------------------------------------------------------------------------------------------------------|-------------------------------------------------------------------------------------------------------------------------------------------------------------------------------------------------------------------------------------------------------------------------------------------|-----------------------------------------------------------------------------------------------------------------------------------------------------------------------------------------------------------------------------------------------|----------------------------------------------------|-----------------------------------------------------|
| <u>Clinical Outcomes</u>                                                                                                 |                                                                                                                                                                                                                                                                                           |                                                                                                                                                                                                                                               |                                                    |                                                     |
| Glycosylated hemoglobin                                                                                                  | HbA <sub>1c</sub> (reduction in mean levels)                                                                                                                                                                                                                                              | 12-hr fasting blood samples                                                                                                                                                                                                                   | NA                                                 | ≥ 0.90                                              |
| Blood pressure                                                                                                           | Systolic and diastolic (reduction in mean levels)                                                                                                                                                                                                                                         | Three readings separated by 1 min, using the Dinemap PRO 100 automated device                                                                                                                                                                 | NA                                                 | ≥ 0.90                                              |
| Lipid levels                                                                                                             | Total, LDL and HDL cholesterol, and triglyceride levels                                                                                                                                                                                                                                   | 12-hr fasting blood samples                                                                                                                                                                                                                   | NA                                                 | ≥ 0.90                                              |
| Smoking                                                                                                                  | Questions reviewed by a study consultant who is an expert on smoking and diabetes                                                                                                                                                                                                         | Questions taken from Centers for Disease Control and Prevention control survey smoking questionnaire <sup>81</sup> and the tobacco cessation questionnaire developed for the Tobacco Cessation Clinic at Columbia-Presbyterian Medical Center | NA                                                 | —                                                   |
| Urine microalbumin                                                                                                       | Urine microalbumin: creatinine ratio                                                                                                                                                                                                                                                      | Spot urine specimen                                                                                                                                                                                                                           | —                                                  | —                                                   |
| <u>Service Utilization, Quality of Life, and Satisfaction</u>                                                            |                                                                                                                                                                                                                                                                                           |                                                                                                                                                                                                                                               |                                                    |                                                     |
| Health care service utilization: Medications and supplies Hospitalization, emergency room, and use of urgent care center | Lists of health insurance categories from Health Care Financing Administration (HCFA), American Association for Retired Persons, and Island Peer Review Organization                                                                                                                      | American Diabetes Association (ADA) <sup>86</sup>                                                                                                                                                                                             | Developed for use with elderly community residents | Intrater reliability range, 0.70–0.95 <sup>82</sup> |
| Physician service use                                                                                                    | Service use questions from modification of ADA survey, Hebrew Home for the Aged at Riverdale (HHAR) service use survey, and NY State Department of Health and HHAR activities-of-daily-living and informal service use measure for adult clients of health care day-centers <sup>82</sup> |                                                                                                                                                                                                                                               |                                                    |                                                     |
| Home care                                                                                                                | The HHAR/United Hospital Fund (UHF) community-based study on home care <sup>83–85</sup>                                                                                                                                                                                                   |                                                                                                                                                                                                                                               |                                                    |                                                     |
| Family care                                                                                                              |                                                                                                                                                                                                                                                                                           |                                                                                                                                                                                                                                               |                                                    |                                                     |

|                                                                                                                                                                                                                           |                                                                                                                                                                                                                        |                                                                   |                                                                    |                                                                                                                                                                                                                                                                                                           |
|---------------------------------------------------------------------------------------------------------------------------------------------------------------------------------------------------------------------------|------------------------------------------------------------------------------------------------------------------------------------------------------------------------------------------------------------------------|-------------------------------------------------------------------|--------------------------------------------------------------------|-----------------------------------------------------------------------------------------------------------------------------------------------------------------------------------------------------------------------------------------------------------------------------------------------------------|
| Quality of life:<br>Diabetes-related quality of life<br>Emotional adjustment                                                                                                                                              | Problem Areas in Diabetes (PAID-2) scale: two subscales, global concerns about diabetes, and interpersonal relationships                                                                                               | Welch et al. <sup>87</sup><br>Polonsky <sup>88</sup>              | Normative data for elderly patients; mean age range 63–67 yr       | Cronbach alpha, 0.95                                                                                                                                                                                                                                                                                      |
| General quality of life:<br>Depression/demoralization                                                                                                                                                                     | SHORT-CARE depression scale                                                                                                                                                                                            | Gurland et al. <sup>72,74,89</sup><br>Golden et al. <sup>73</sup> | Several large probability - samples of elderly community residents | Cronbach alpha, 0.87 for development samples. <sup>73</sup><br>In a subsequent study, <sup>90</sup> the interrater reliability coefficient, using a sample of 13 raters and 8 videotapes, was 0.94<br>Cronbach alphas ranged from the 0.70s to the 0.90s across other community and institutional samples |
| Satisfaction with care:                                                                                                                                                                                                   | Diabetes Quality Improvement Project (DQIP) <sup>91</sup> and ADA Patient Satisfaction Survey <sup>92</sup>                                                                                                            | HCFA <sup>91</sup><br>ADA <sup>92</sup>                           | NA                                                                 | NA                                                                                                                                                                                                                                                                                                        |
| <u>Process-of-Care (Intermediate)</u><br><u>Outcomes</u>                                                                                                                                                                  |                                                                                                                                                                                                                        |                                                                   |                                                                    |                                                                                                                                                                                                                                                                                                           |
| Compliance with care plan, health care practices (e.g., alcohol use)                                                                                                                                                      | Diabetes self-care activities (alcohol items from a multi-ethnic study of atherosclerosis)                                                                                                                             | Toobert et al. <sup>93</sup>                                      | Three studies: average ages, 60.8–67 yr; range, 42–75 yr           | Range of average inter-item correlations, 0.20–0.78; test-retest reliability, 0.43–0.58                                                                                                                                                                                                                   |
| Provider practices:<br>Dilated eye exam < 1 yr<br>Lipid profile < 2 yr<br>Foot care < 1 yr with Semmes-Weinstein monofilaments<br>Self-monitoring of blood glucose<br>Self-monitoring of blood pressure (if hypertensive) | Patient Satisfaction Survey that also assesses the frequency of specific practices of health care providers during the previous 12 mo; e.g., how often a provider performed examinations associated with diabetes care | ADA <sup>92</sup>                                                 | NA                                                                 | NA                                                                                                                                                                                                                                                                                                        |

Continued on following page

Summary of Variable Category, Constructs, Measures, Sources, and Psychometric Properties of Outcome Measures in IDEATel, *continued*

| Variable Category/Construct                                         | Measure                                                                                                | Source of Measure                                                                                                                           | Populations for Normative Data                              | Reliability Estimate                                                                                                                                                                                   |
|---------------------------------------------------------------------|--------------------------------------------------------------------------------------------------------|---------------------------------------------------------------------------------------------------------------------------------------------|-------------------------------------------------------------|--------------------------------------------------------------------------------------------------------------------------------------------------------------------------------------------------------|
| <u>Process-of-Care (Intermediate)</u><br><u>Outcomes, continued</u> |                                                                                                        |                                                                                                                                             |                                                             |                                                                                                                                                                                                        |
| Education and knowledge                                             | Diabetes Quality Improvement Project (DQIP)                                                            | HCFA <sup>91</sup>                                                                                                                          | NA                                                          | NA                                                                                                                                                                                                     |
| Health beliefs                                                      | Three items measuring beliefs that caring for diabetes will lead to improvements in health             | Diabetes Quality-of-life Clinical Trial Questionnaire <sup>94</sup>                                                                         | Mean 58.2 in sample of patients with type 2 diabetes        | NA                                                                                                                                                                                                     |
| Self-efficacy                                                       | Self-efficacy shown to be significant predictor of initiation and continuation of self-care behavior   | Shorridge-Baggert et al. <sup>95</sup>                                                                                                      | Convenience sample of 94 non-elderly patients (Netherlands) | Cronbach alphas: 0.81 (patient), 0.90 (informant)                                                                                                                                                      |
| Access to care                                                      | Questions examining environmental, transportation, and isolation factors that may limit access to care | Developed by diabetologist for IDEATel project                                                                                              | NA                                                          | NA                                                                                                                                                                                                     |
| <u>Intervening/Case Mix or Control Variables</u>                    |                                                                                                        |                                                                                                                                             |                                                             |                                                                                                                                                                                                        |
| Generic function and health: Activities of daily living             | Comprehensive Assessment and Referral Evaluation (CARE) activities-of-daily-living scale               | CARE <sup>73,77,96,97</sup>                                                                                                                 | Several probability samples of elderly patients             | Interrater intraclass correlation coefficient in 0.90s; Cronbach alphas of 0.95 for development samples <sup>73</sup> and 0.84 in the Systolic Hypertension in the Elderly (SHEP) study. <sup>90</sup> |
| Vision impairment                                                   | CARE/Lighthouse for the Blind functional vision scale                                                  | Functional vision screening scale <sup>76</sup> modified by Lighthouse for the Blind from vision disorder subscale of CARE <sup>73,77</sup> | Several probability samples of elderly community residents; | Internal consistency of scale: 0.80 and 0.85 in two CARE vision development samples, 0.92 in replication sample <sup>73</sup>                                                                          |

|                                                                                 |                                                                                                                                                                                                                                                        |                                                                                                                                                                                                                                      |                                                                      |                                                                                                                                                                         |                                             |
|---------------------------------------------------------------------------------|--------------------------------------------------------------------------------------------------------------------------------------------------------------------------------------------------------------------------------------------------------|--------------------------------------------------------------------------------------------------------------------------------------------------------------------------------------------------------------------------------------|----------------------------------------------------------------------|-------------------------------------------------------------------------------------------------------------------------------------------------------------------------|---------------------------------------------|
| Health status (measures also considered by some to be quality-of-life measures) | One item from SF-12 and several items from other health measures, and a self-report version of the Charlson Comorbidity Index                                                                                                                          | Medical Outcomes Study, Short-Form 36 <sup>98</sup><br>CARE <sup>99</sup><br>Diabetes Quality-of-Life Clinical Trial Questionnaire <sup>94</sup><br>Visual analog scales <sup>100</sup><br>Charlson Comorbidity Index <sup>101</sup> | Charlson: hospital inpatients and female patients with breast cancer | NA                                                                                                                                                                      | samples of elderly patients with low vision |
| Disease-specific health<br>Severity of illness                                  | Type 2 diabetes symptom checklist: case mix variables measure severity and duration of symptoms associated with diabetes; six symptom dimensions addressed—hyperglycemic, hypoglycemic, ophthalmologic, psychological, cardiovascular, and neuropathic | Grootenhuis et al. <sup>102</sup>                                                                                                                                                                                                    | Samples of elderly patients; mean age, 65 ± 11 yr                    | Internal consistency estimates, measured by Cronbach alpha: range 0.76–0.95<br>Test-retest reliability measured by Pearson product moment correlations: range 0.79–0.94 |                                             |
| Illness burden                                                                  | Diabetes Hassles Scale                                                                                                                                                                                                                                 | Greenfield et al. <sup>103</sup>                                                                                                                                                                                                     |                                                                      |                                                                                                                                                                         |                                             |
| Social support                                                                  | Kin and non-kin social support and close contact                                                                                                                                                                                                       | Family Support Measure (FSM) <sup>104</sup><br>Lubben Social Support <sup>105</sup>                                                                                                                                                  | Scales developed for use in elderly populations                      | FSM: NA<br>Lubben: Cronbach alpha, 0.70                                                                                                                                 |                                             |

#### Demographic and Descriptive Data

|                                                |                                                                                                                                                                                                |                        |
|------------------------------------------------|------------------------------------------------------------------------------------------------------------------------------------------------------------------------------------------------|------------------------|
| Age                                            | Race/ethnicity <sup>107–109</sup> : Office of Management and Budget directives—race as five categories, including combinations of mixed races; separate designation of ethnic group membership | Census classifications |
| Sex                                            |                                                                                                                                                                                                |                        |
| Race                                           |                                                                                                                                                                                                |                        |
| Ethnicity                                      |                                                                                                                                                                                                |                        |
| Marital status                                 |                                                                                                                                                                                                |                        |
| Education level                                | Occupation codes from Bureau of Labor Statistics ( <a href="http://www.bls.gov">http://www.bls.gov</a> )                                                                                       |                        |
| Occupation                                     |                                                                                                                                                                                                |                        |
| Income and sources                             |                                                                                                                                                                                                |                        |
| Acculturation (Latino subjects) <sup>106</sup> |                                                                                                                                                                                                |                        |

NOTES: Health care service utilization data are collected by telephone every 3 mo. Other outcome data are collected annually during in-person visits. NA indicates not available.

## APPENDIX REFERENCES

81. National Health Interview Survey. National Center for Health Statistics Web site. Available at: <http://www.cdc.gov/nchs/nhis.htm>. Accessed Nov 12, 2001.
82. Teresi JA, Holmes D, Dichter E, Koren M, Ramirez M, Fairchild S. Prevalence of behavior disturbance to family and staff in a sample of adult day health care clients. *Gerontologist*. 1997;37:629–39.
83. Hokenstad A, Ramirez M, Haslanger K, Finneran K. Medicaid home care services in New York City: service utilization and family involvement. New York: United Hospital Fund, 1998.
84. Hokenstad A, Ramirez M, Haslanger K, Finneran K. Medicaid home care services in New York City: demographics, health conditions, and impairment levels of New York City's Medicaid home care population. New York: United Hospital Fund, 1997.
85. Holmes D, Teresi J, Ramirez M, Gould D, Haslanger K, Hokenstad A. Hours and costs of Medicaid reimbursed in-home personal care [abstract]. *Gerontologist*. 1996;36:196.
86. American Diabetes Association. Patient Satisfaction Questionnaire. Washington, DC: ADA, 1996.
87. Welch GW, Jacobson AM, Polonsky WH. The Problem Areas in Diabetes scale: an evaluation of its clinical utility. *Diabetes Care*. 1997;20:760–6.
88. Polonsky WH. Assessing diabetes-related emotional distress with the PAID-2 [unpublished manuscript]. Written communication with author (RW), June 2000.
89. Gurland N, Golden R, Teresi J, Challop J. The SHORT-CARE: an efficient instrument for the assessment of depression, dementia, and disability. *J Gerontol*. 1984;39:166–9.
90. Gurland B, Teresi J, McFate-Smith W, Black D, Hughes G, Edlavitch S. The effects of treating isolated systolic hypertension on cognitive status and depression in the elderly. *J Am Geriatr Soc*. 1988;36:1015–22.
91. American Diabetes Association, the Foundation for Accountability, Health Care Financing Administration, and the National Committee for Quality Assurance. Diabetes Quality Improvement Project (DQIP). HCFA Web site. Available at: <http://www.hcfa.gov/quality/3l.htm>. Accessed Dec 5, 2001.
92. American Diabetes Association. Patient Satisfaction Survey. Washington, DC: ADA, 1998.
93. Toobert DJ, Glasgow RE. Assessing diabetes self-management: the Summary of Diabetes Self-care Activities Questionnaire. In: Bradley C (ed). *Handbook of Psychology and Diabetes*. Berkshire, UK: Harwood Academic, 1994:351–75.
94. Shen M, Kotsanos JG, Huster WJ, Mathias SD, Andrejasich CM, Patrick DL. Development and validation of the Diabetes Quality of Life clinical trial questionnaire. *Med Care*. 1999;37:AS45–66.
95. Shortridge-Baggett LM, van der Bijl JJ. International collaborative research on management self-efficacy in diabetes mellitus. *J NY State Nurses Assoc*. 1996;27:9–14.
96. Teresi J, Golden R, Gurland B, Wilder D, Bennett R. Construct validity of indicator scales developed for the Comprehensive Assessment and Referral Evaluation (CARE) interview schedule. *J Gerontol*. 1984;39:147–57.
97. Teresi JA, Golden R, Gurland B. Concurrent and predictive validity of the indicator scales developed for the Comprehensive Assessment and Referral Evaluation (CARE) interview schedule. *J Gerontol*. 1984;39:158–65.
98. Ware JE, Sherbourne CD. The MOS 36-item Short-Form Health Survey (SF-36), part I: conceptual framework and item selection. *Med Care*. 1992;30:473–83.
99. Gurland BJ, Kuriansky JB, Sharpe L, Simon R, Stiller P, Birkett P. The Comprehensive Assessment and Referral Evaluation (CARE): rationale, development and reliability. *Int J Aging Human Dev*. 1977;8:9–42.
100. Brazier J, Jones N, Kind P. Testing the validity of the Euroqol and comparing it with the SF-36 Health Survey questionnaire. *Qual Life Res*. 1993;2:169–80.
101. Charlson ME, Pompei P, Ales KL, MacKenzie CR. A new method of classifying prognostic comorbidity in longitudinal studies: development and validation. *J Chron Dis*. 1987;40:373–83.
102. Grootenhuis PA, Snoek FJ, Heine RJ, Bouter LM. Development of a type 2 diabetes symptom checklist: a measure of symptom severity. *Diabetes Med*. 1994;11:253–61.
103. Greenfield S, Kaplan SH, Silliman RA, et al. The uses of outcomes research for medical effectiveness, quality of care, and reimbursement in type II diabetes. *Diabetes Care*. 1994;17:32–9.
104. Holmes D, Teresi J, Ramirez M, et al. Informal vs. formal supports for impaired elderly people. *Gerontologist*. 1989;29:195–202.
105. Lubben JE. Assessing social networks among elderly populations. *Fam Commun Health*. 1988;11:42–52.
106. Marin G, Sabogal F, Marin BV, Otero-Sabogal R, Perez-Stable EJ. Development of a short acculturation scale for Hispanics. *Hispanic J Behav Sci*. 1987;9:183–205.
107. U.S. Census 2000. Washington, DC: U.S. Census Bureau, 2000.
108. Revisions to the standards for the classification of federal data on race and ethnicity. *Federal Register*. Oct 30, 1997: 58781–90.
109. Wallman KK, Evinger S, Schechter S. Measuring our nation's diversity: developing a common language for data on race/ethnicity. *Am J Pub Health*. 2000;90:1704–8.
